# Supplementary material for: Elucidating the chemiexcitation of dioxetanones by replacing the peroxide bond with S–S, N–N and C–C bonds
Source: Royal Society of Chemistry journal article supplement (doi:10.1039/d1nj03440e), 2021-01-01
Supplement: d1nj03440e1.pdf [file d1nj03440e1.pdf]

## **Elucidating the Chemiexcitation of Dioxetanones by Replacing the Peroxide Bond with S-S, N-N and C-C Bonds**

Carla M. Magalhães,<sup>a</sup> Patricia González-Berdullas,<sup>a</sup> Joaquim C.G. Esteves da Silva<sup>a,b</sup>  
and Luís Pinto da Silva<sup>\*a,b</sup>

*a. Chemistry Research Unit (CIQUP), Faculty of Sciences of University of Porto (FCUP), Rua do Campo Alegre 697, 4169-007, Porto, Portugal.*

*b. LACOMEPhi, GreenUPorto, Faculty of Sciences of University of Porto (FCUP), Rua do Campo Alegre 697, 4169-007, Porto, Portugal.*

*\*e-mail: [luis.silva@fc.up.pt](mailto:luis.silva@fc.up.pt)*

**Figure S1** – Bond length (in angström) of the peroxide/non-peroxide and -C-C- bond of the four-membered ring, as a function of intrinsic reaction coordinates, for **Ia** (A), **Ib** (B), **Ic** (C) and **Id** (D). .....S1

**Figure S2** – ( $S^2$ ) variation as a function of intrinsic reaction coordinates for **Ia-d**. .....S2

**Figure S3** – Electron spin density variation between the cyclic peroxide ring and the benzene moiety of **Ia**, as a function of intrinsic reaction coordinates (A). Mulliken spin density of **Ia**, within the biradical region, represented by color atoms by density (B). .....S3

**Figure S4** – NBO atomic charge variation, as a function of intrinsic reaction coordinates, between the benzaldehyde and carbon dioxide fragments resulting from the thermolysis of **Ia** (A). NBO atomic charge variation, as a function of intrinsic reaction coordinates, between the phenylmethanimine and isocyanic acid fragments resulting from the thermolysis of **Ic** (B). .....S4

**Table 1** – Cartesian coordinates of the transition state for the thermolysis reaction of **Ia**, obtained at the UwB97XD/6-31G(d,p) level of theory. ....S5

**Table S2** – Cartesian coordinates of the transition state for the thermolysis reaction of **Ib**, obtained at the U

**Table S3** – Cartesian coordinates of the transition state for the thermolysis reaction of **Ic**, obtained at the U

**Table S4** – Cartesian coordinates of the transition state for the thermolysis reaction of **Id**, obtained at the U

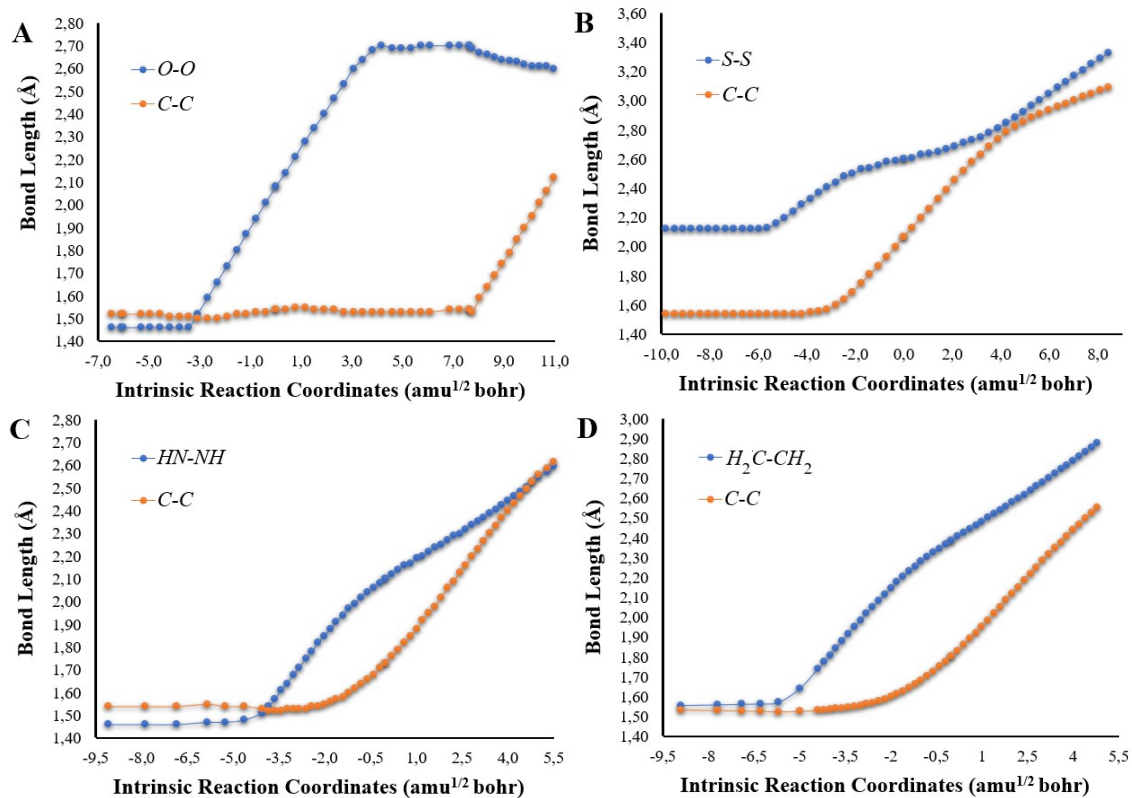

**Figure S1** – Bond length (in angström) of the peroxide/non-peroxide and -C-C- bond of the four-membered ring, as a function of intrinsic reaction coordinates, for **Ia** (A), **Ib** (B), **Ic** (C) and **Id** (D).

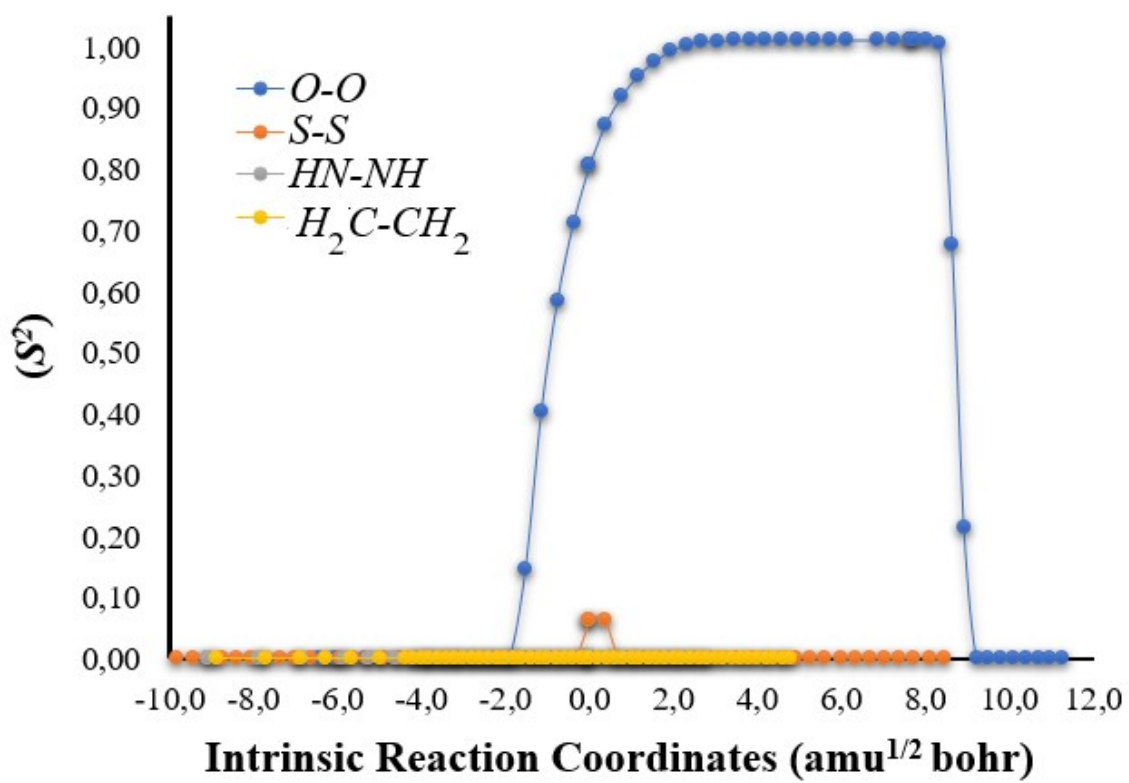

**Figure S2** –  $(S^2)$  variation as a function of intrinsic reaction coordinates for **Ia-d**.

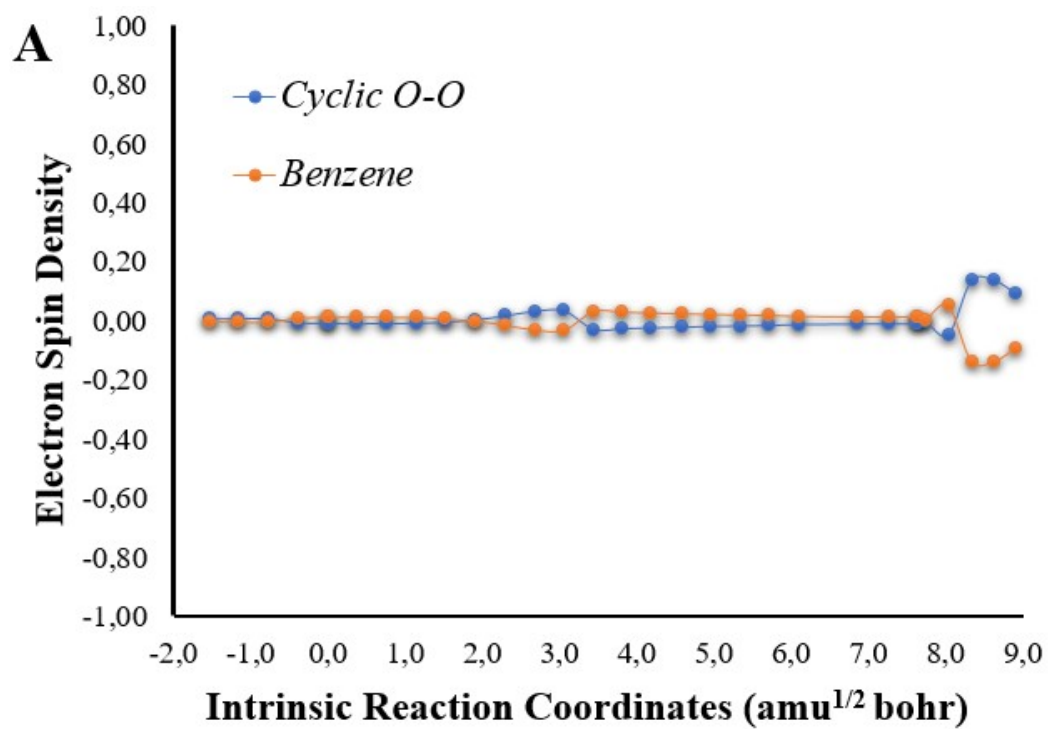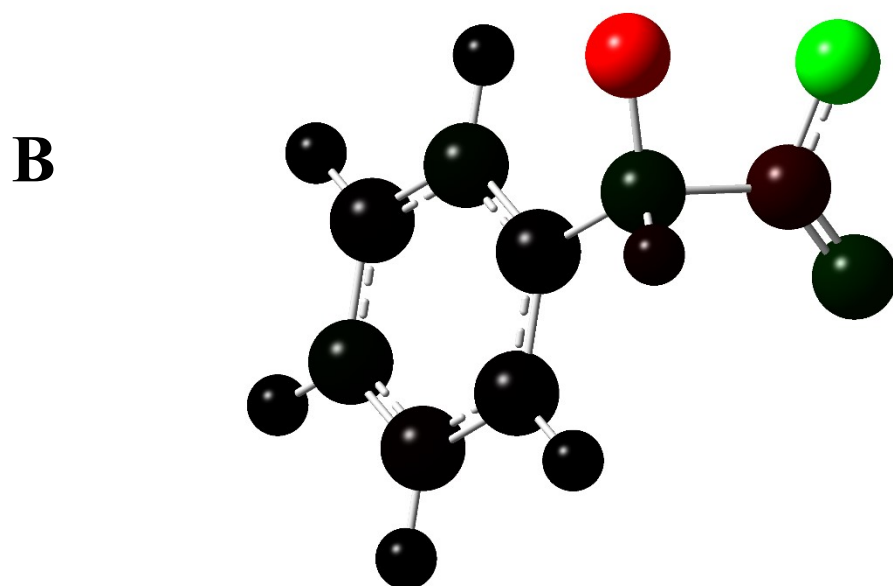

**Figure S3** – Electron spin density variation between the cyclic peroxide ring and the benzene moiety of **Ia**, as a function of intrinsic reaction coordinates (**A**). Mulliken spin density of **Ia**, within the biradical region, represented by color atoms by density (**B**).

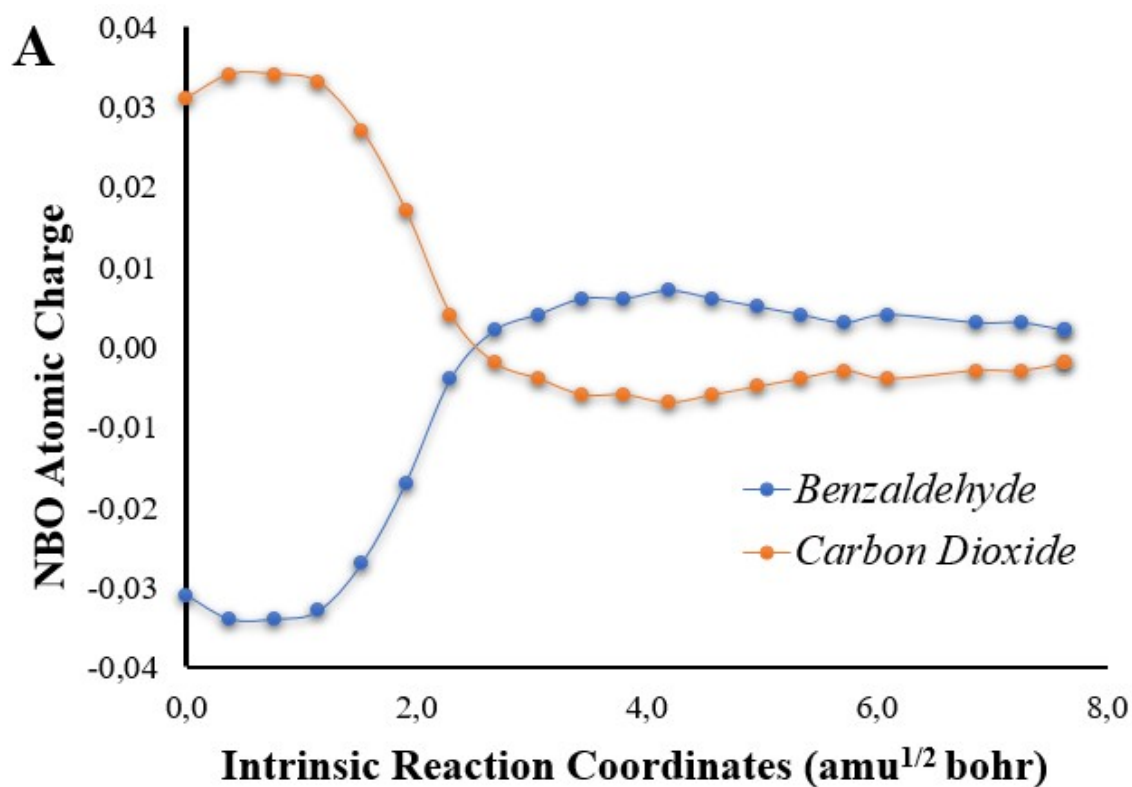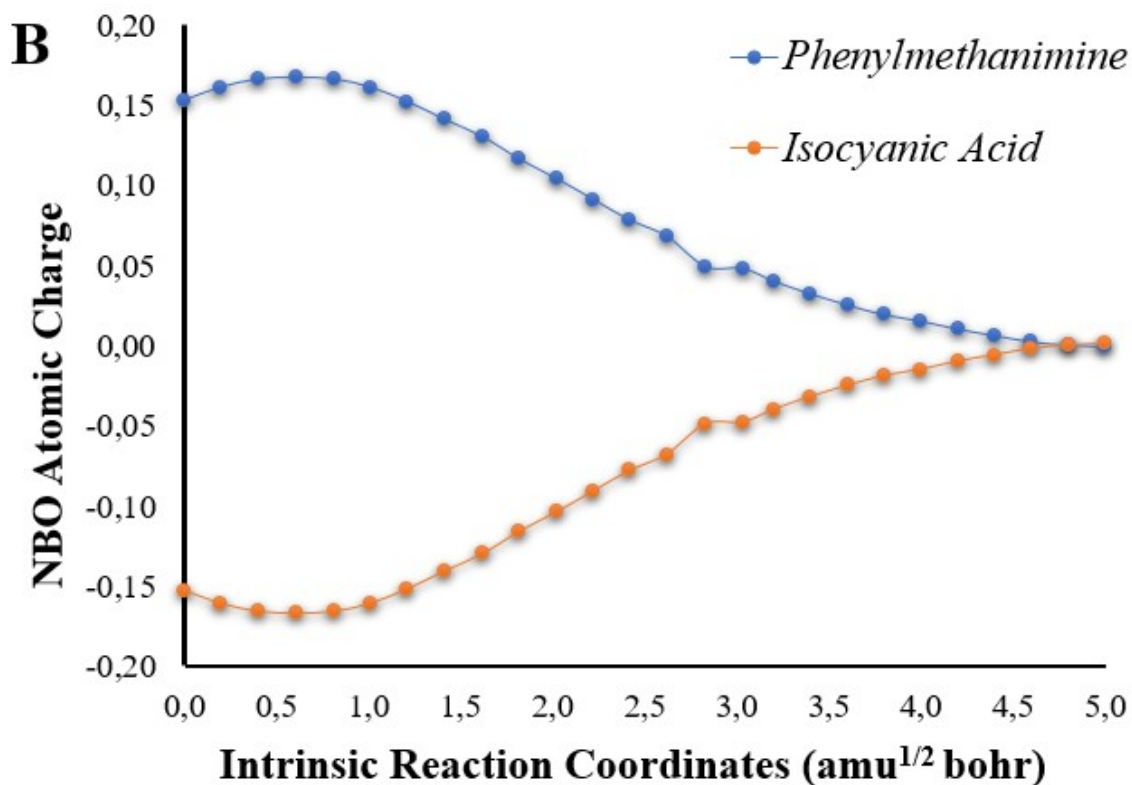

**Figure S4** – NBO atomic charge variation, as a function of intrinsic reaction coordinates, between the benzaldehyde and carbon dioxide fragments resulting from the thermolysis of **Ia** (A). NBO atomic charge variation, as a function of intrinsic reaction coordinates, between the phenylmethanimine and isocyanic acid fragments resulting from the thermolysis of **Ic** (B).

---

**Table S1** – Cartesian coordinates of the transition state for the thermolysis reaction of **Ia**, obtained at the U $\omega$ B97XD/6-31G(d,p) level of theory.

---

|   |             |             |             |
|---|-------------|-------------|-------------|
| O | 0.73722100  | 1.61776400  | -1.42068200 |
| C | -0.13997500 | 1.22555900  | -0.42806500 |
| C | 0.70005200  | 1.72738800  | 0.76087800  |
| O | 1.75992700  | 2.32486500  | 0.24279800  |
| O | 0.52958300  | 1.63578200  | 1.94294100  |
| C | -0.43599200 | -0.25089400 | -0.33888400 |
| C | -1.56537000 | -0.68029300 | 0.35585400  |
| C | -1.82264700 | -2.04035300 | 0.48858800  |
| C | -0.95554000 | -2.97108700 | -0.07707400 |
| C | 0.17031200  | -2.54024100 | -0.77396600 |
| C | 0.43511300  | -1.18120400 | -0.90219700 |
| H | -1.06081600 | 1.83077600  | -0.44396500 |
| H | -2.24132600 | 0.04746500  | 0.79636200  |
| H | -2.70158000 | -2.37298700 | 1.03078500  |
| H | -1.15723800 | -4.03234800 | 0.02564400  |
| H | 0.84706600  | -3.26448700 | -1.21544500 |
| H | 1.30931700  | -0.83362100 | -1.44222600 |

**Table S2** – Cartesian coordinates of the transition state for the thermolysis reaction of **Ib**, obtained at the U $\omega$ B97XD/6-31G(d,p) level of theory.

|   |             |             |             |
|---|-------------|-------------|-------------|
| C | -0.66765300 | 0.82926300  | -0.49421400 |
| C | 0.57548600  | 1.39383000  | 1.05637900  |
| O | -0.01890400 | 1.31359400  | 2.05368100  |
| C | -0.82718300 | -0.62862900 | -0.30556400 |
| C | -1.93481800 | -1.08976300 | 0.41526700  |
| C | -2.11267600 | -2.44834300 | 0.64542900  |
| C | -1.18084200 | -3.36449300 | 0.16596600  |
| C | -0.06998800 | -2.91282500 | -0.54307100 |
| C | 0.10995300  | -1.55570600 | -0.77571700 |
| H | -1.51086000 | 1.43983400  | -0.17404700 |
| H | -2.66090100 | -0.37602400 | 0.79484700  |
| H | -2.97950400 | -2.79197000 | 1.20053000  |
| H | -1.31850800 | -4.42579900 | 0.34516400  |
| H | 0.66202900  | -3.62259300 | -0.91477800 |
| H | 0.97721700  | -1.20446500 | -1.32605300 |
| S | 0.42765200  | 1.54848900  | -1.53595200 |
| S | 2.08951400  | 1.80994500  | 0.44915200  |



---

**Table S3** – Cartesian coordinates of the transition state for the thermolysis reaction of **Ic**, obtained at the UωB97XD/6-31G(d,p) level of theory.

---

|   |             |             |             |
|---|-------------|-------------|-------------|
| N | 0.23920900  | 1.87960100  | -1.29847200 |
| C | -0.35574200 | 1.22678300  | -0.25642200 |
| C | 0.95821000  | 1.84090700  | 0.68995400  |
| N | 1.98570400  | 1.70772600  | -0.14374800 |
| O | 0.74623500  | 2.33648700  | 1.75491200  |
| C | -0.50080600 | -0.26432100 | -0.20230000 |
| C | -1.68654300 | -0.80461700 | 0.29566500  |
| C | -1.86767600 | -2.18307200 | 0.34310700  |
| C | -0.86280400 | -3.03311200 | -0.10713400 |
| C | 0.32626000  | -2.49884100 | -0.59796000 |
| C | 0.51011600  | -1.12210200 | -0.64337100 |
| H | -1.20087400 | 1.77813100  | 0.15621700  |
| H | -2.47376600 | -0.14177500 | 0.64405900  |
| H | -2.79476200 | -2.59220500 | 0.73128200  |
| H | -1.00240100 | -4.10860000 | -0.06987600 |
| H | 1.11828900  | -3.15842000 | -0.93765700 |
| H | 1.45479200  | -0.70871700 | -0.98548300 |
| H | 2.80412600  | 2.20554600  | 0.22899500  |
| H | 0.76124500  | 1.22406900  | -1.88361700 |

---

**Table S4** – Cartesian coordinates of the transition state for the thermolysis reaction of **Id**, obtained at the U $\omega$ B97XD/6-31G(d,p) level of theory.

---

|   |             |             |             |
|---|-------------|-------------|-------------|
| C | 0.67745200  | 1.88198400  | -1.21980300 |
| C | -0.16757600 | 1.31546200  | -0.24576200 |
| C | 1.37364800  | 1.55604100  | 0.66250500  |
| C | 1.58359200  | 2.92121500  | 0.73028300  |
| O | 2.00388300  | 0.55960700  | 0.92638000  |
| C | -0.56574100 | -0.11750400 | -0.20862400 |
| C | -1.84545600 | -0.43459900 | 0.25289100  |
| C | -2.28182100 | -1.75432700 | 0.29178500  |
| C | -1.43779200 | -2.77761400 | -0.12648700 |
| C | -0.15721900 | -2.47110000 | -0.57821600 |
| C | 0.27881600  | -1.15221300 | -0.61896500 |
| H | -0.92693500 | 1.98629300  | 0.15050000  |
| H | -2.50931800 | 0.36031300  | 0.58221500  |
| H | -3.28041200 | -1.98066100 | 0.65163400  |
| H | -1.77338300 | -3.80928800 | -0.09535900 |
| H | 0.51228600  | -3.26425000 | -0.89515800 |
| H | 1.29015300  | -0.93331300 | -0.94036300 |
| H | 2.45163300  | 3.29003700  | 1.27084900  |
| H | 0.77407600  | 3.61406800  | 0.55114700  |
| H | 0.55426100  | 2.89357700  | -1.58045200 |
| H | 1.37286400  | 1.25749100  | -1.77143300 |
